# Supplementary material for: An intelligent peptide recognizes and traps Mycobacterium tuberculosis to inhibit macrophage phagocytosis
Source: Royal Society of Chemistry journal article supplement (doi:10.1039/d2tb01764d), 2022-11-28
Supplement: d2tb01764d1.pdf [file d2tb01764d1.pdf]

## Supplementary Information

### **An intelligent peptide recognizes and traps *Mycobacterium tuberculosis* to inhibit macrophage phagocytosis**

Gui-Yuan Wang,<sup>ab</sup> Bin Lu,<sup>c</sup> Xu Cui,<sup>\*c</sup> Guang Li,<sup>c</sup> Kuo Zhang<sup>b</sup>, Qing-Shi Zhang,<sup>b</sup> Xin Cui,<sup>ab</sup> Gao-Feng Qi,<sup>ab</sup> Qi-Lin Liang,<sup>b</sup> Xiao-Bo Luo,<sup>c</sup> Huan-Ge Xu,<sup>b</sup> Li Xiao,<sup>d</sup> Lei Wang<sup>\*b</sup> and Litao Li<sup>\*c</sup>

<sup>a</sup> Department of Graduate, Hebei North University, Zhangjiakou 075000, Hebei Province, China.

<sup>b</sup> CAS Center for Excellence in Nanoscience, CAS Key Laboratory for Biomedical Effects of Nanomaterials and Nanosafety, National Center for Nanoscience and Technology (NCNST), Beijing, 100190, China.

E-mail: [wanglei@nanoctr.cn](mailto:wanglei@nanoctr.cn).

<sup>c</sup> Department of Orthopedics, The 4th Medical Center of Chinese PLA General Hospital, No. 51 Fucheng road, Beijing, 100091, China.

E-mail: cuixuprossor@163.com, lltop\_1@sina.com.

<sup>d</sup> Institute of Respiratory and Critical Medicine, the Eighth Medical Center of PLA General Hospital, Beijing 100091, China.

Gui-Yuan Wang and Bin Lu contribute equally to the study.

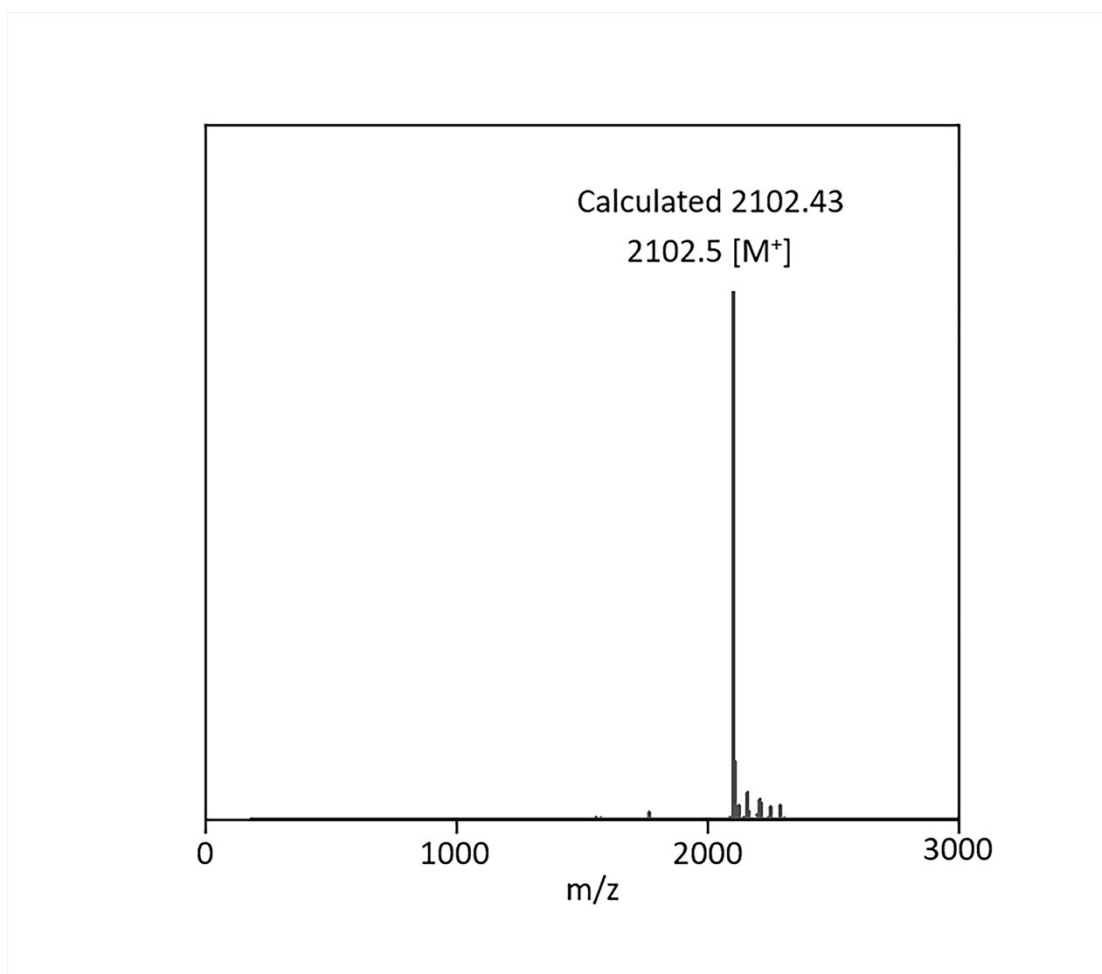

**Fig S1.** The MALDI-TOF-MS spectrum of BFH.

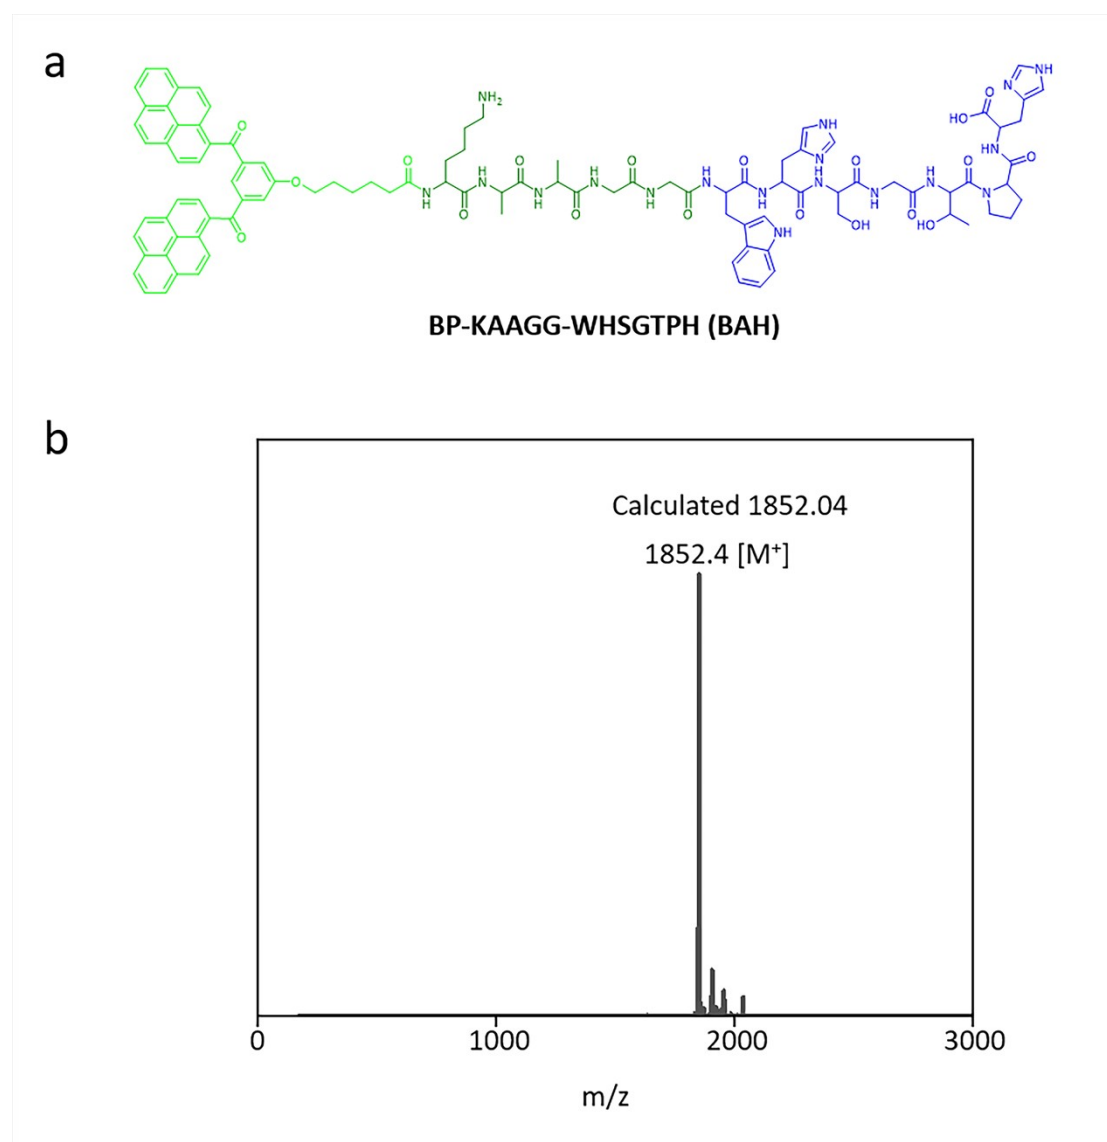

**Fig S2.** (a) Molecular structure of BAH. (b) The MALDI-TOF-MS spectrum of BAH.

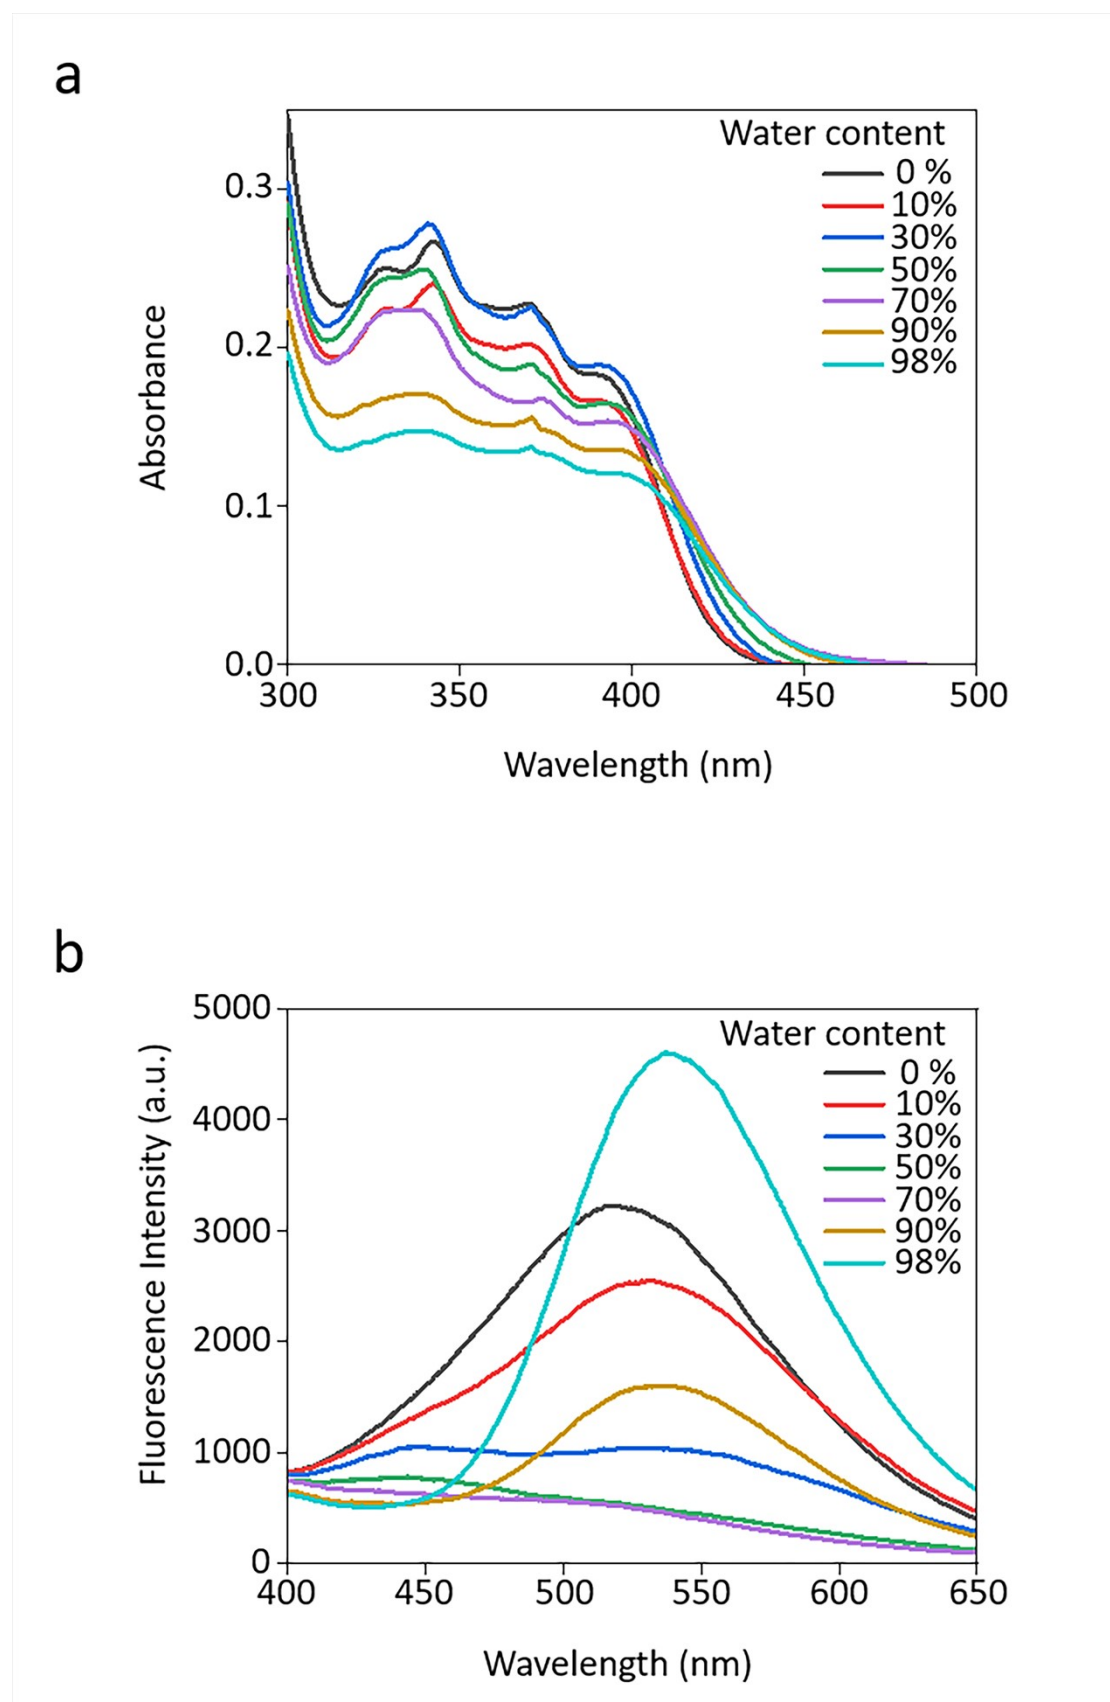

**Fig S3.** (a) UV-vis and (b) fluorescence spectra characteristics of self-assembly process to form BAH NPs (30  $\mu\text{M}$ ) in mixed  $\text{H}_2\text{O}/\text{DMSO}$  solutions.

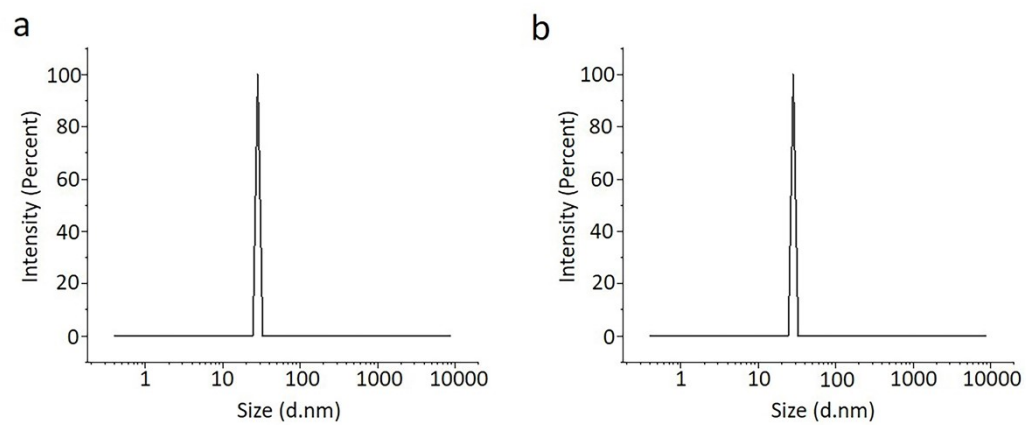

**Fig S4.** Particle size of (a) BFH NPs and (b) BAH NPs from DLS.

a

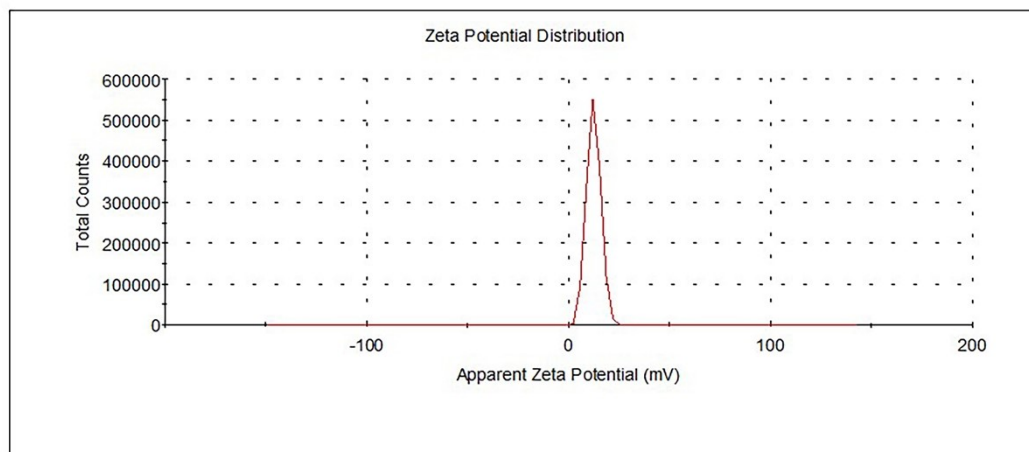

b

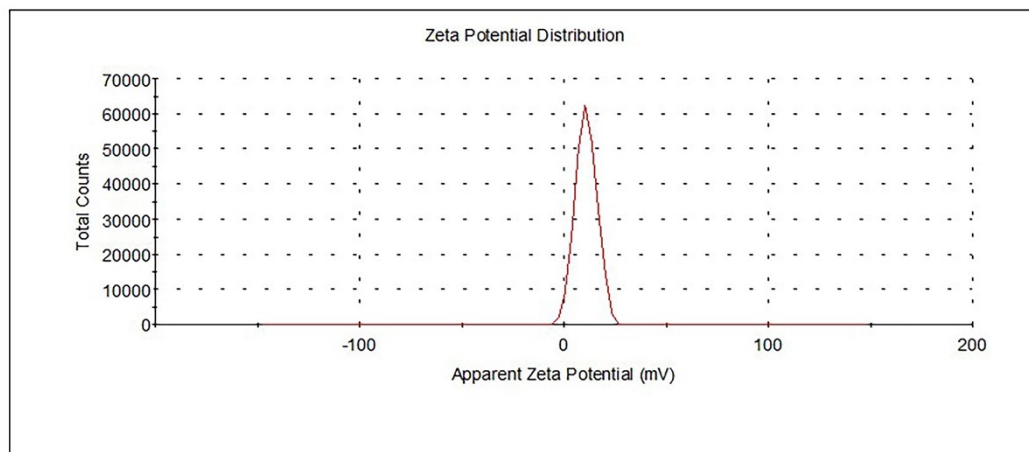

**Fig S5.** Zeta potential of (a) BFH NPs and (b) BAH NPs.

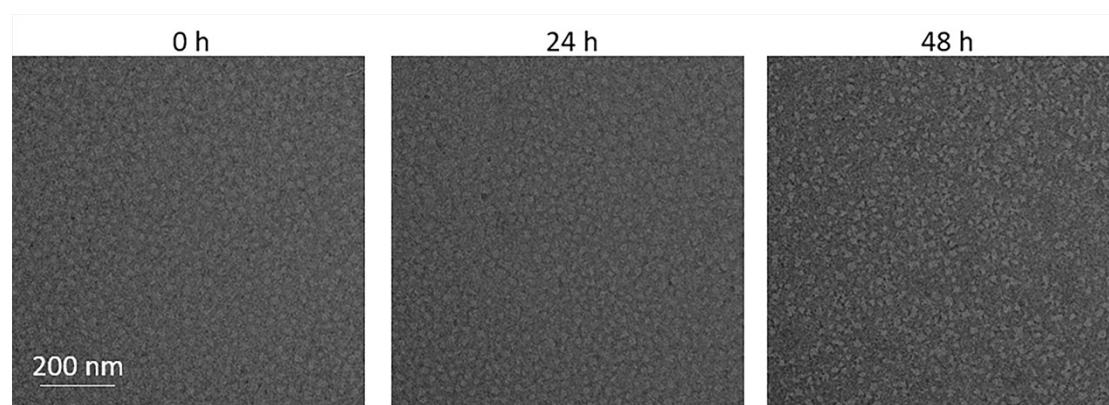

**Fig S6.** TEM images of BAH (30  $\mu$ M) NPs incubated with *BCG* in 48h.

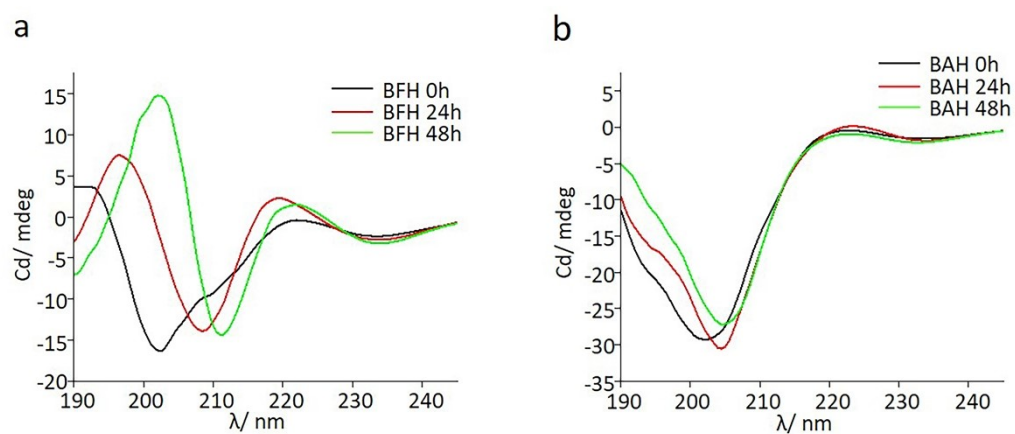

**Fig S7.** CD spectra of *BCG* incubated with (a) BFH and (b) BAH in water/HFIP (v/v = 99/1) at different time points.



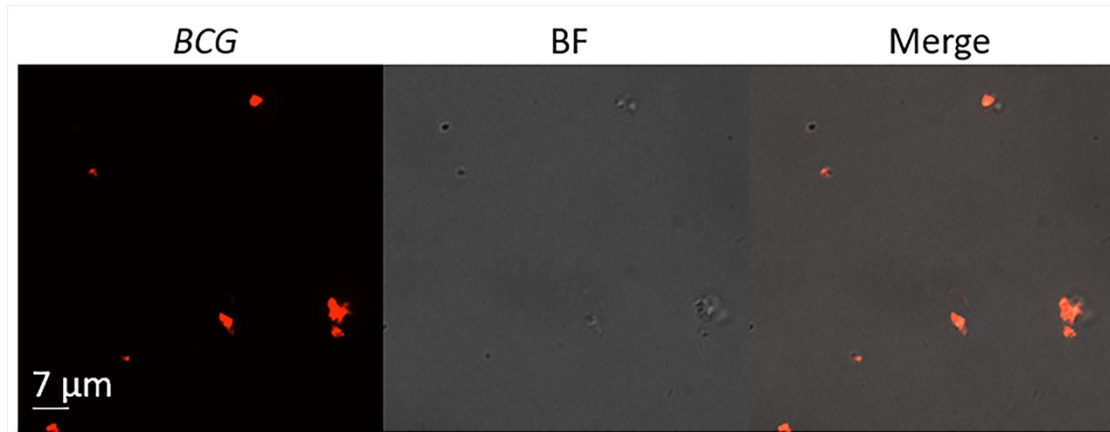

**Fig S8.** CLSM image of Texas red-stained *BCG*.

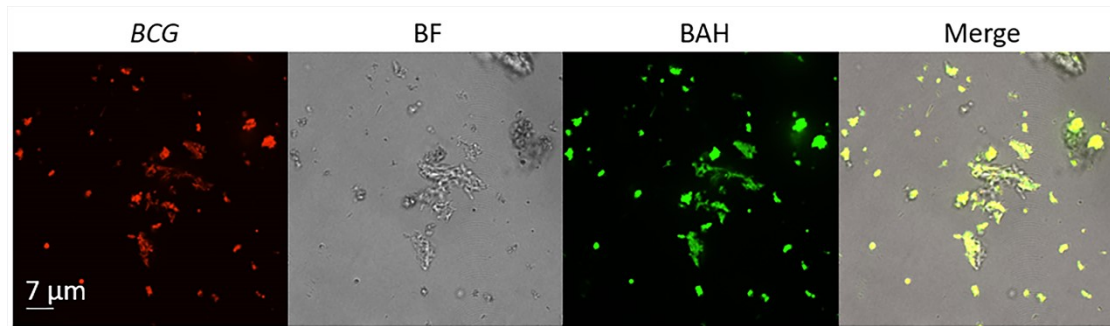

**Fig S9.** CLSM images of BAH (30  $\mu\text{M}$ ) NPs with *BCG* for 4 h. The *BCG* was stained by Texas red.

*E. coli*

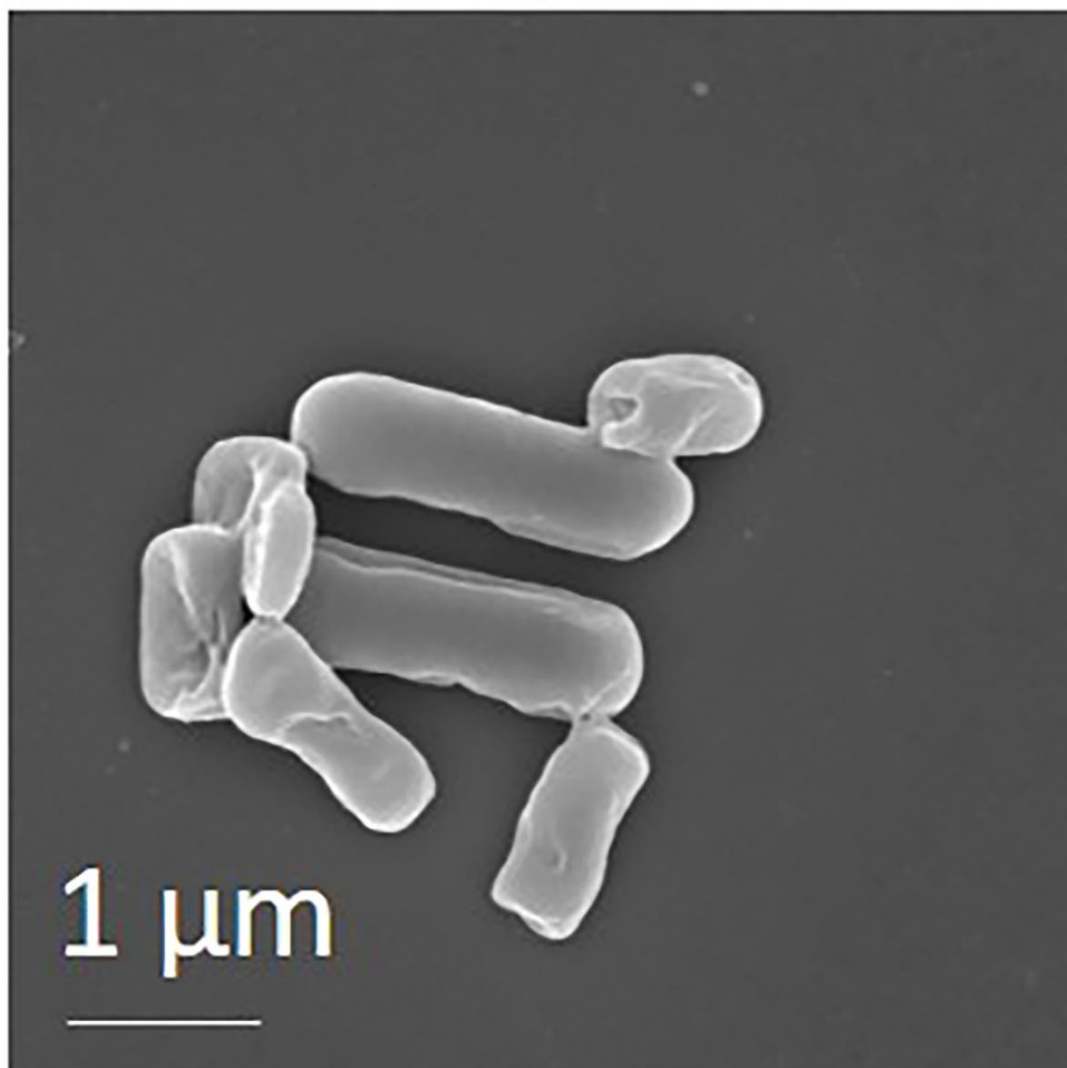

**Fig S10.** SEM image of BHF NPs incubated *E. coli* for 4 h.

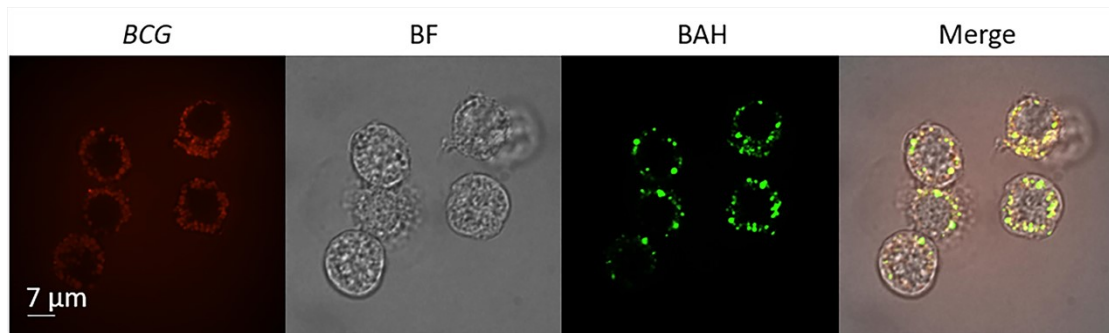

**Fig S11.** CLMS images of co-incubation of BAH NPs, *BCG* and macrophages.

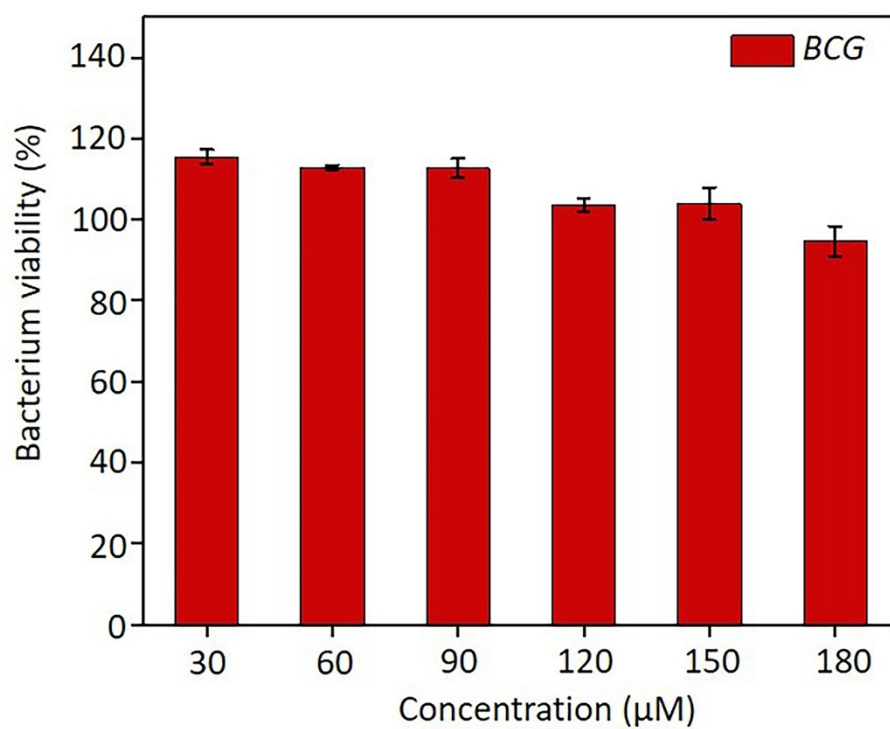

**Fig S12.** The toxicity of BFH NPs to *M. tuberculosis*.
